# Supplementary material for: Genome-wide association study in a Chinese population identifies a susceptibility locus for type 2 diabetes at 7q32 near PAX4
Source: Springer Nature journal article supplement (doi:10.1007/s00125-013-2874-4), 2013-03-26

**ESM Fig. 2. Multidimensional scaling analysis (MDS) plot shows the first two principal components, based on genotype data of 3 case-controls cohorts (Hong Kong GWAS 1, Hong Kong GWAS 2 and Shanghai GWAS) in the stage 1 genome scan of the present study without HapMap scaling.**

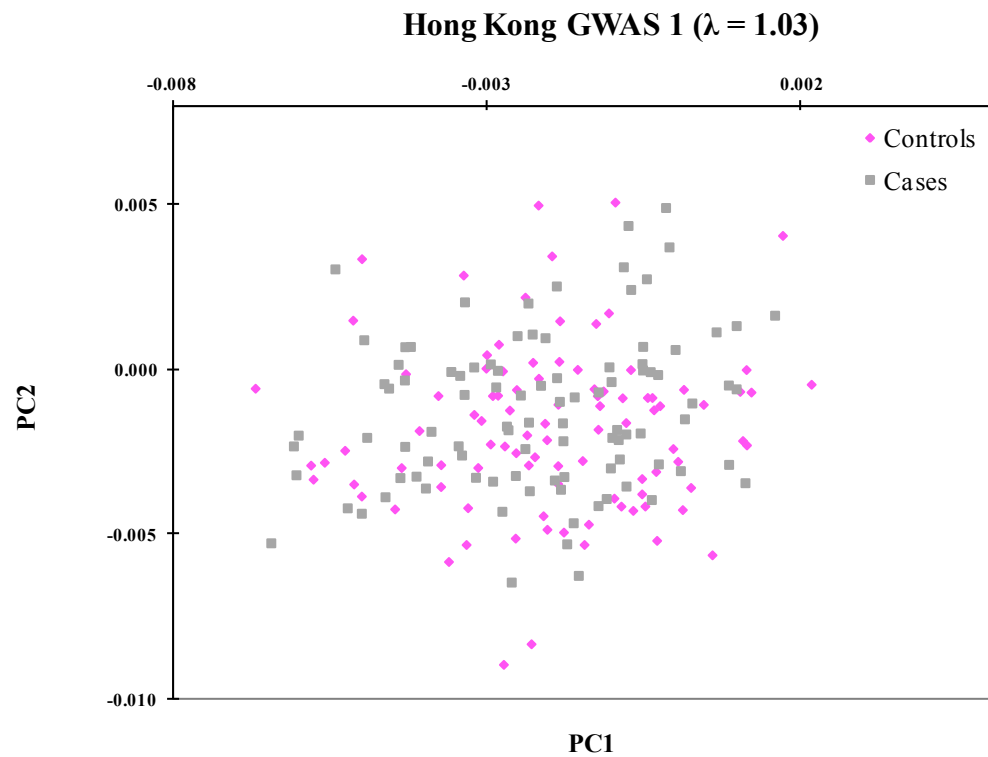

### Hong Kong GWAS 2 ( $\lambda = 1.01$ )

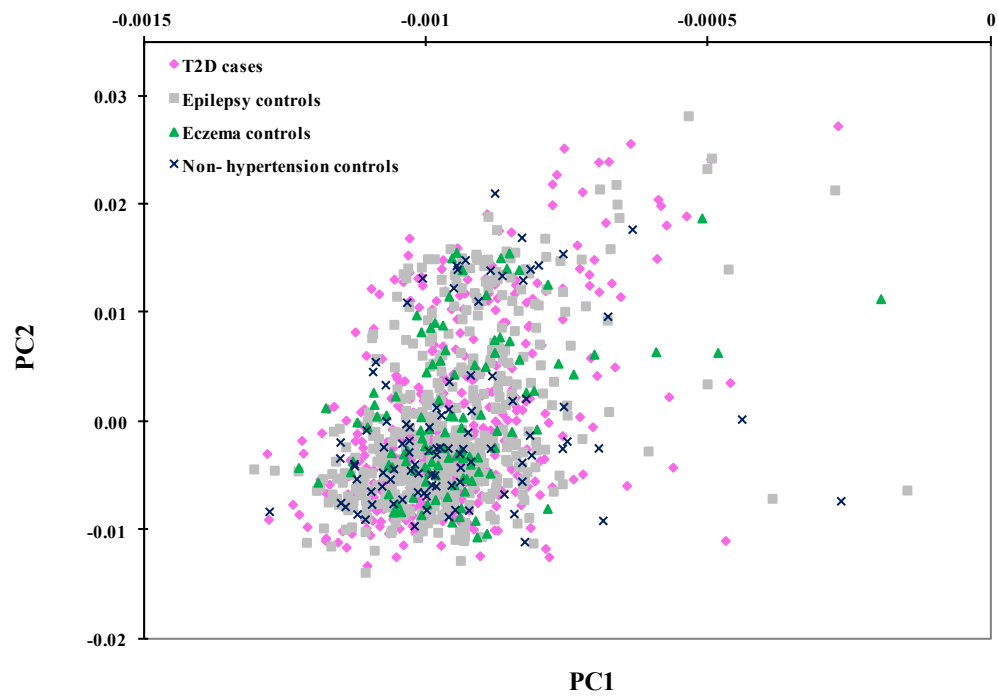

Shanghai GWAS ( $\lambda = 1.04$ )

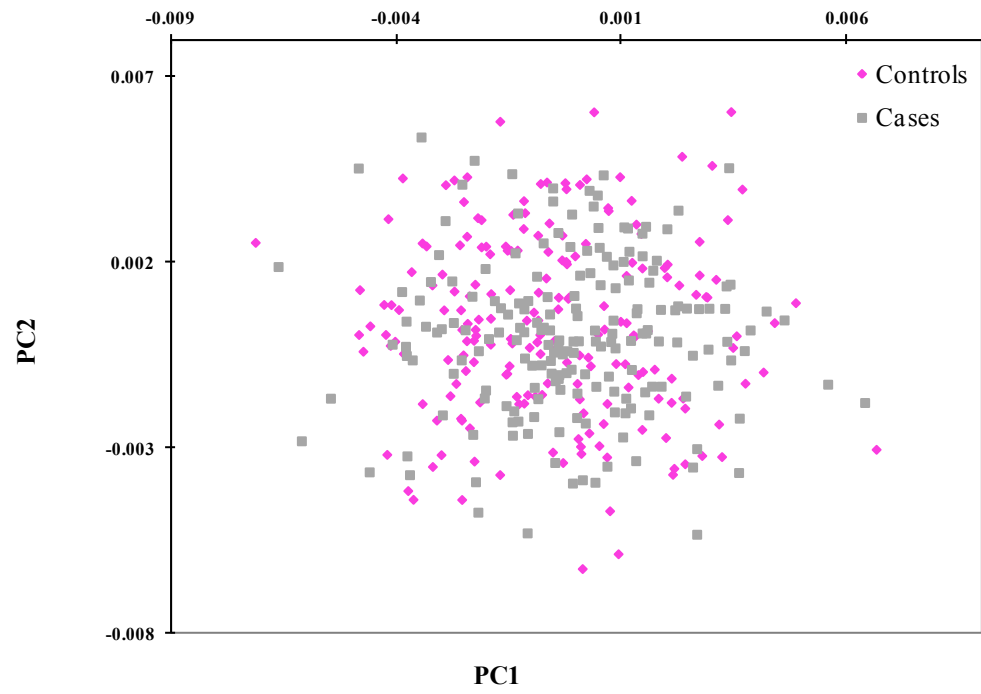

Supplement: MOESM4 [file 8091500]
