# Supplementary material for: Genome-wide association study in a Chinese population identifies a susceptibility locus for type 2 diabetes at 7q32 near PAX4
Source: Springer Nature journal article supplement (doi:10.1007/s00125-013-2874-4), 2013-03-26

**ESM Fig. 3. Q-Q plot for combined genome-wide association results in a total of 684 T2D patients and 955 controls based on the 2,925,090 analyzed SNPs. The black lines represent the upper and lower boundaries of the 95% confidence bands.**

**Original**

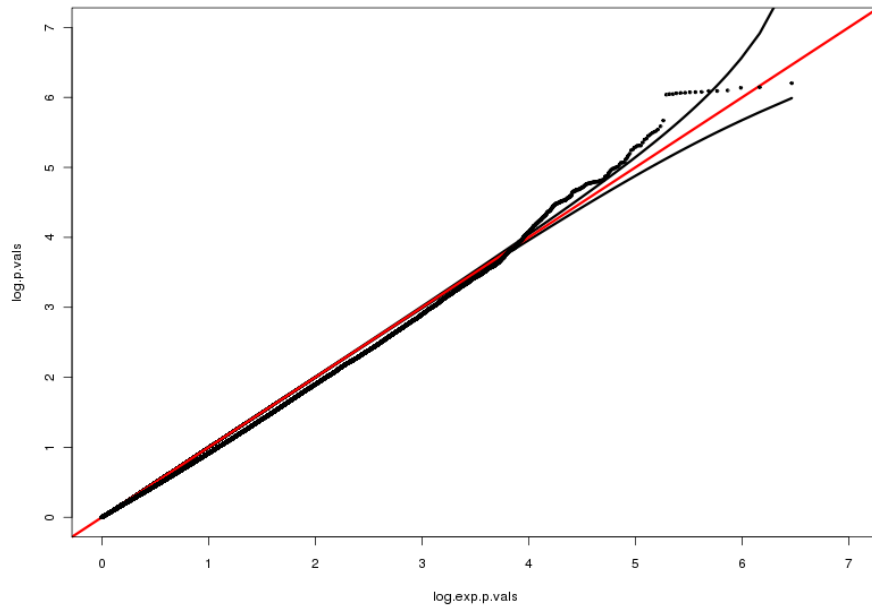

**Genomic control**

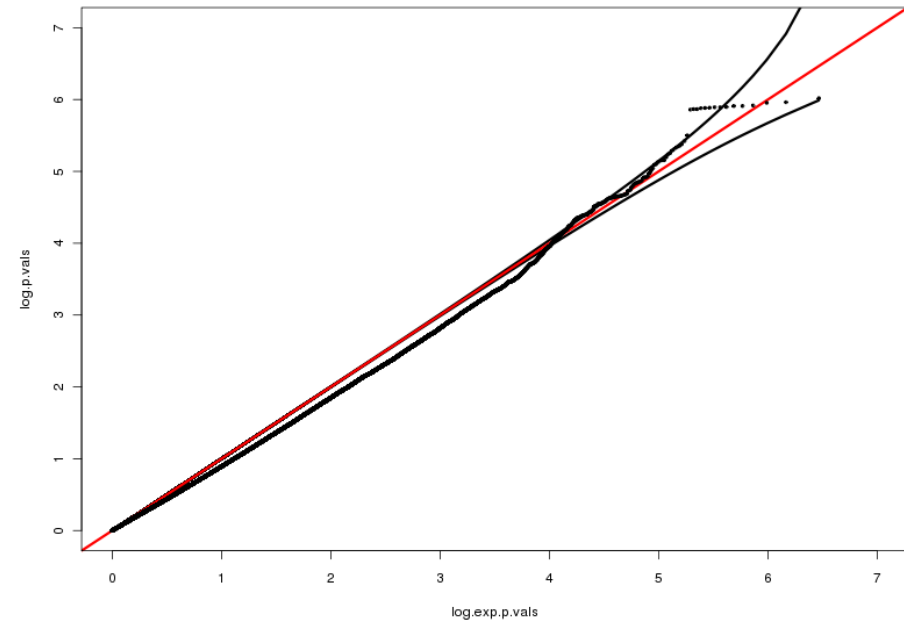

Supplement: MOESM5 [file 8091500]
