# Supplementary material for: Genome-wide association study in a Chinese population identifies a susceptibility locus for type 2 diabetes at 7q32 near PAX4
Source: Springer Nature journal article supplement (doi:10.1007/s00125-013-2874-4), 2013-03-26

**ESM Fig. 4. Distribution of ENCODE open chromatin sites around the identified gene region (NCBI Build 36.1/hg18 CHR7:127033000-127084685) annotated in the UCSC human genome browser on human (<http://genome.ucsc.edu/>). The distribution of open chromatin across the identified gene region in pancreatic islets (depicted as peaks) is highlighted inside the red box (labeled PanIsle FAIRE FD and highlighted by red arrow). The position of rs10229583 and other tagging SNPs in high LD to this lead SNP are marked by the black arrows at the top of the figure.**

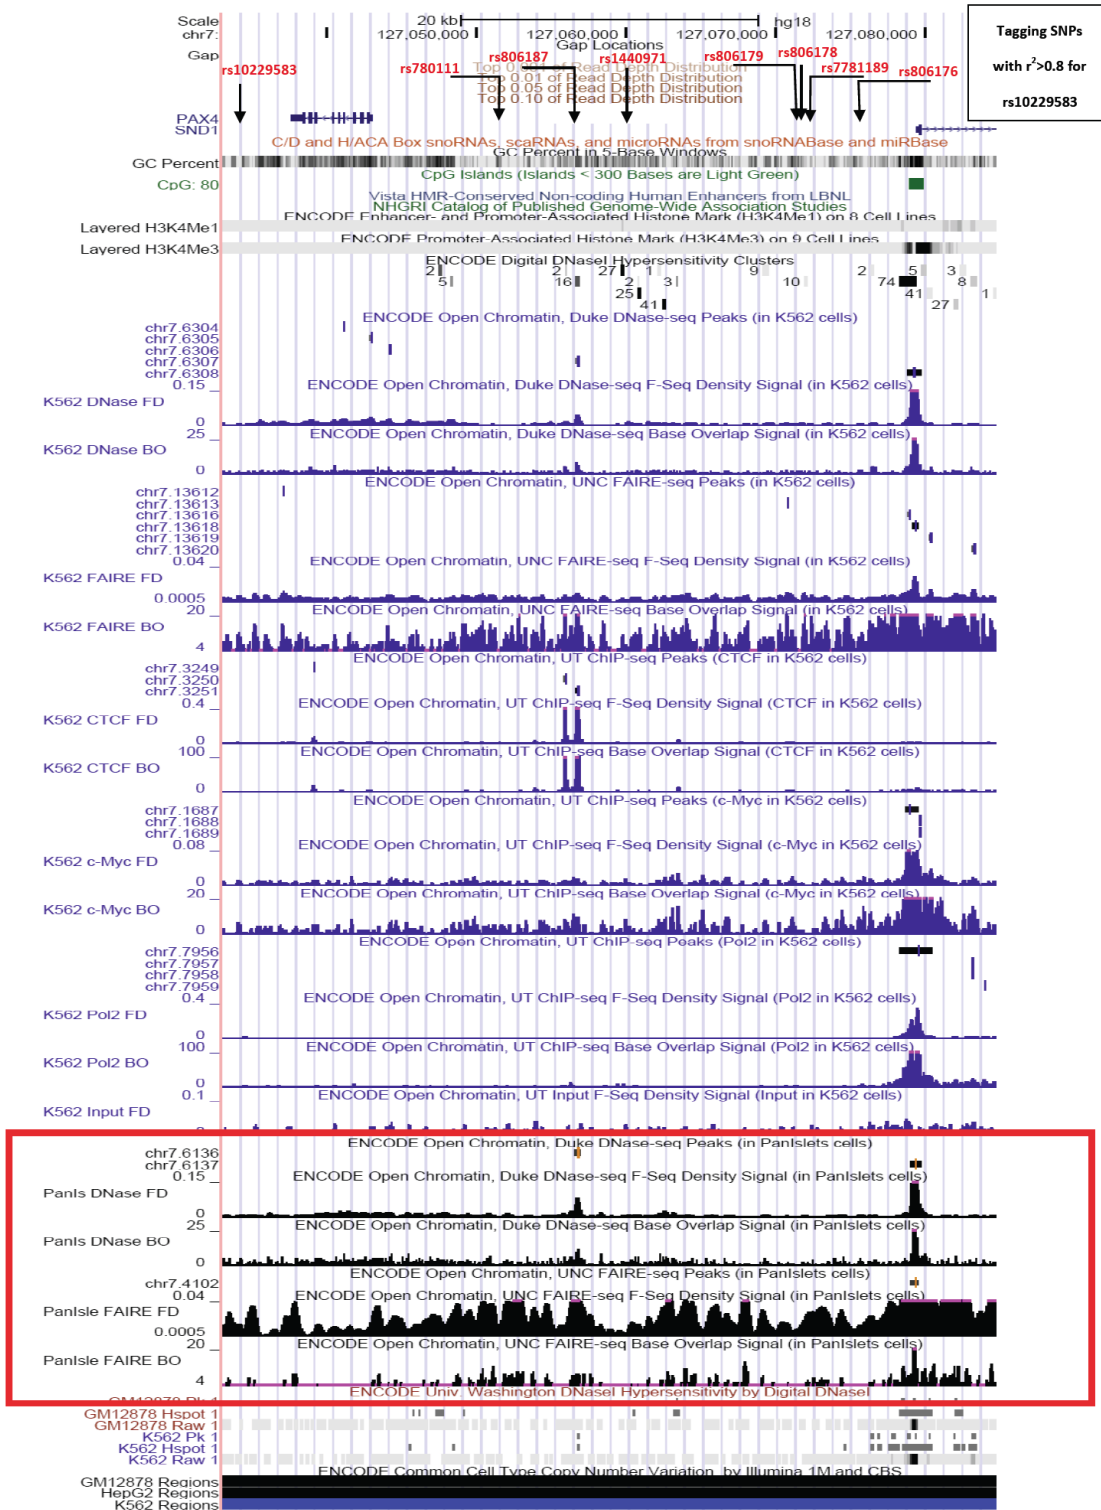

Supplement: MOESM6 [file 8091500]
