# Supplementary material for: Genome-wide association study in a Chinese population identifies a susceptibility locus for type 2 diabetes at 7q32 near PAX4
Source: Springer Nature journal article supplement (doi:10.1007/s00125-013-2874-4), 2013-03-26

ESM Fig. 5. eQTL analysis from the GenCord Project showing association of rs1440971 with expression level of genes within 1MB of the SNP

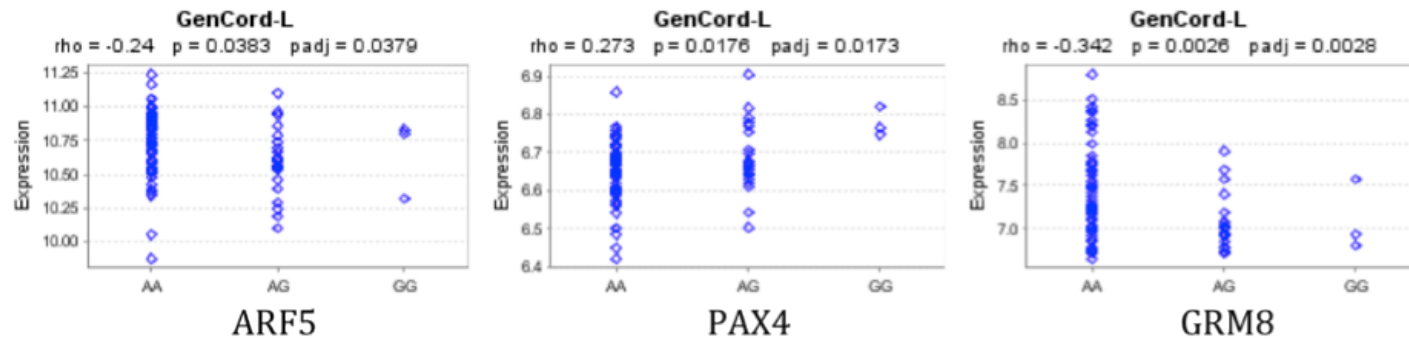

Supplement: MOESM7 [file 8091500]
