# Supplementary material for: Genome-wide association study in a Chinese population identifies a susceptibility locus for type 2 diabetes at 7q32 near PAX4
Source: Springer Nature journal article supplement (doi:10.1007/s00125-013-2874-4), 2013-03-26

ESM Fig. 7. Comparison of varLD scores within 100Kb region centred on index SNP rs10229583 between pairs of populations using HapMap phase III CHB, JPT, CEU and YRI data.

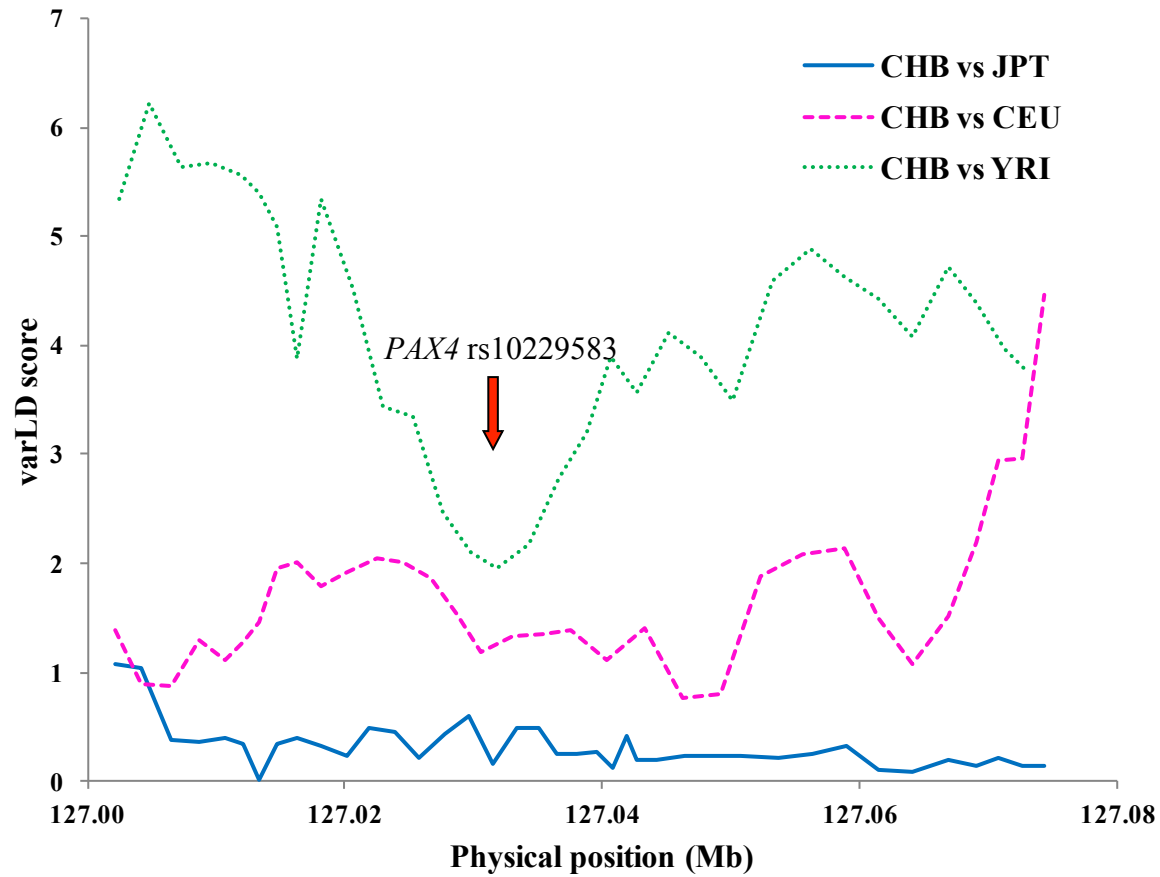

Supplement: MOESM9 [file 8091500]
