# Supplementary material for: Genome-wide association study in a Chinese population identifies a susceptibility locus for type 2 diabetes at 7q32 near PAX4
Source: Springer Nature journal article supplement (doi:10.1007/s00125-013-2874-4), 2013-03-26
Supplement: MOESM10 [file 8091500]

**ESM Fig. 8. Linkage disequilibrium for SNPs within the region near PAX4 on chromosome 7 between 126.95 Mb and 127.06 Mb (Build 36). Pairwise  $r^2$  among SNPs for HapMap CEU and CHB are indicated in upper and lower block, respectively. Shades of grey represent the strength of pairwise  $r^2$ . Rs10229583 and rs6467136 are the SNPs showing significant association with T2D in the present study and the study conducted by the East Asian Consortium, respectively.**

# HapMap CEU

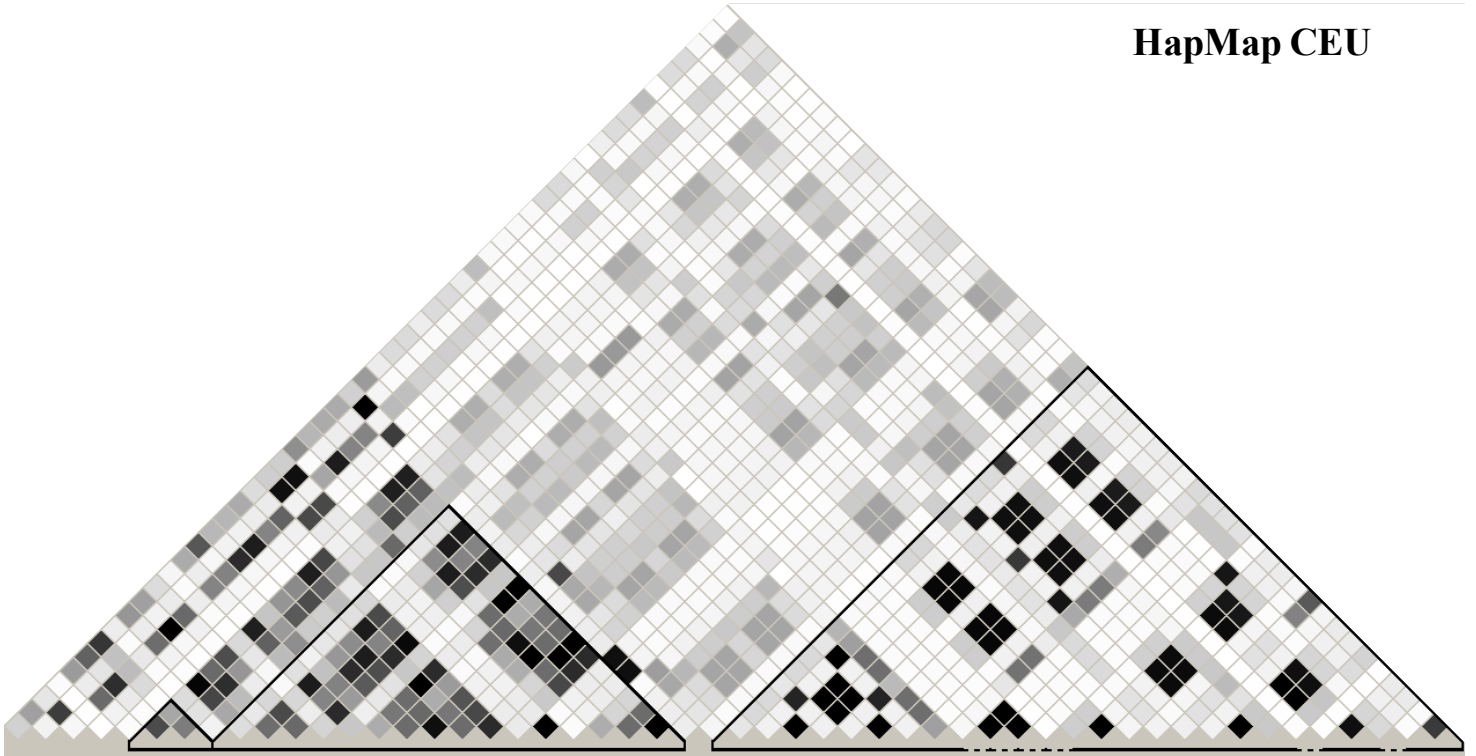

rs6467136

rs10229583

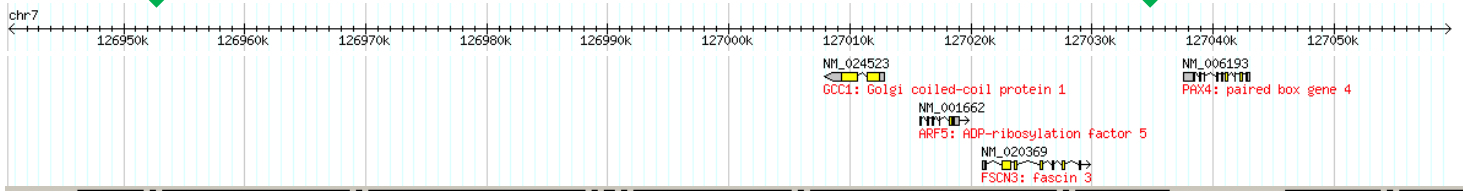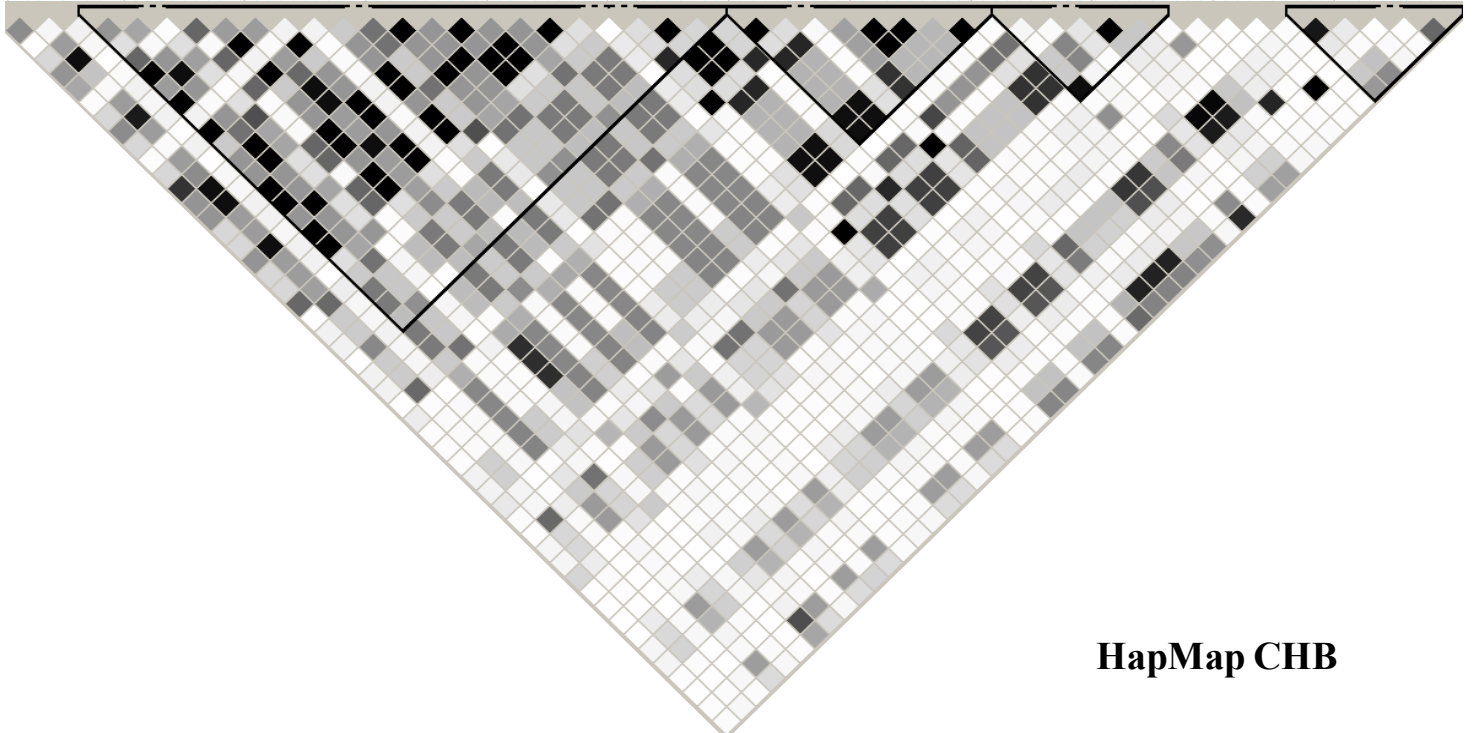

# HapMap CHB
