# Supplementary material for: Genome-wide association study in a Chinese population identifies a susceptibility locus for type 2 diabetes at 7q32 near PAX4
Source: Springer Nature journal article supplement (doi:10.1007/s00125-013-2874-4), 2013-03-26
Supplement: MOESM11 [file 8091500]

**ESM Table 1. Quality control of the participants in stage 1.**

|                                      | <u>HK 1</u>     |              | <u>HK 2</u>     |              |                  | <u>SH</u>       |              |     |
|--------------------------------------|-----------------|--------------|-----------------|--------------|------------------|-----------------|--------------|-----|
|                                      | <u>Controls</u> | <u>Cases</u> | <u>Controls</u> | <u>Cases</u> | <u>Cases</u>     | <u>Controls</u> | <u>Cases</u> |     |
|                                      |                 |              | Epilepsy        | Eczema       | Non-hypertension |                 |              |     |
| Number of subject before QC          | 102             | 100          | 457             | 111          | 100              | 400             | 200          | 200 |
| Exclusion criteria:                  |                 |              |                 |              |                  |                 |              |     |
| duplicate                            | 0               | 0            | 0               | 0            | 0                | 0               | 0            | 0   |
| Relatedness                          | 2               | 0            | 0               | 0            | 0                | 2               | 0            | 0   |
| gender problem                       | 1               | 1            | 7               | 1            | 0                | 8               | 3            | 3   |
| overall call rate <0.98              | 0               | 0            | 0               | 0            | 0                | 0               | 2            | 1   |
| problem of population stratification | 0               | 0            | 0               | 0            | 1                | 2               | 0            | 0   |
| missing phenotype data               | 0               | 0            | 0               | 0            | 0                | 0               | 0            | 0   |
| Number of subject after QC           | 99              | 99           | 450             | 110          | 99               | 388             | 197          | 197 |
