# Supplementary material for: Genome-wide association study in a Chinese population identifies a susceptibility locus for type 2 diabetes at 7q32 near PAX4
Source: Springer Nature journal article supplement (doi:10.1007/s00125-013-2874-4), 2013-03-26
Supplement: MOESM12 [file 8091500]

**ESM Table 2. Quality control of the genotyping results in stage 1.**

|                                                                                             | <u>HK 1</u>     |              | <u>HK 2</u>              |         |                  | <u>SH</u>       |              |         |
|---------------------------------------------------------------------------------------------|-----------------|--------------|--------------------------|---------|------------------|-----------------|--------------|---------|
|                                                                                             | <u>Controls</u> | <u>Cases</u> | <u>Diseased Controls</u> |         | <u>Cases</u>     | <u>Controls</u> | <u>Cases</u> |         |
|                                                                                             |                 |              | Epilepsy                 | Eczema  | Non-hypertension |                 |              |         |
| Number of SNPs on chromosomes 1 – 22 before QC                                              | 541,224         | 541,224      | 460,992                  | 576,857 | 492,147          | 576,498         | 334,157      | 334,157 |
| Stepwise exclusion criteria:                                                                |                 |              |                          |         |                  |                 |              |         |
| Step 1: Monomorphic SNPs                                                                    | 58,440          | 57,680       | 0                        | 53,422  | 194              | 51,746          | 25,397       | 24,237  |
| Step 2: SNPs with 100% missing genotype                                                     | 78              | 78           | 0                        | 112     | 0                | 0               | 2            | 0       |
| Step 3: SNPs with MAF < 5% and their call rate is < 99%                                     | 3,050           | 3,132        | 118                      | 894     | 250              | 2,476           | 1,388        | 3,468   |
| Step 4: SNPs with MAF ≥ 5% and their call rate is < 95%                                     | 2,000           | 2,591        | 0                        | 1,546   | 70               | 2,037           | 630          | 2,926   |
| Step 5: SNPs with overall MAF < 1%                                                          | 9,656           | 9,967        | 81                       | 26,447  | 1,311            | 27,618          | 236          | 214     |
| Step 6: SNPs without HWE ( $P < 1 \times 10^{-4}$ )                                         | 463             | 458          | 54                       | 598     | 19               | 575             | 12,281       | 12,486  |
| Step 7: SNPs with different MAF between diseased control cohorts ( $P < 1 \times 10^{-4}$ ) | --              | --           | 47                       | 47      | 47               | --              | --           | --      |
| Number of SNPs on chromosome 1 – 22 after QC                                                | 467,537         | 467,318      | 460,692                  | 493,791 | 490,256          | 492,046         | 294,223      | 290,826 |
