# Supplementary material for: Genome-wide association study in a Chinese population identifies a susceptibility locus for type 2 diabetes at 7q32 near PAX4
Source: Springer Nature journal article supplement (doi:10.1007/s00125-013-2874-4), 2013-03-26
Supplement: MOESM13 [file 8091500]

**ESM Table 3. Selection rationales of SNPs for stage 2 replication.**

| SNP                           | Chr | Gene           | Reason for selection                                                         |
|-------------------------------|-----|----------------|------------------------------------------------------------------------------|
| <u>Unconditional analysis</u> |     |                |                                                                              |
| rs10229583                    | 7   | <i>PAX4</i>    | genotyped SNP                                                                |
| rs1440971                     | 7   | <i>PAX4</i>    | proxy of genotyped SNP (MAF ~ 0.1, $r^2 = 0.77$ , $D' = 1$ , to rs10229583)  |
| rs2737250                     | 8   | <i>TRPS1</i>   | genotyped SNP ( $r^2 = 0.9$ , $D' = 0.1$ , to top imputed SNP, MAF = 0.3)    |
| rs2721960                     | 8   | <i>TRPS1</i>   | 2nd top imputed SNP (MAF = 0.3)                                              |
| rs3858158                     | 10  | <i>COL13A1</i> | top imputed SNP                                                              |
| rs2395272                     | 10  | <i>COL13A1</i> | 2nd top imputed SNP                                                          |
| rs57703465                    | 10  | <i>COL13A1</i> | 3rd top imputed SNP                                                          |
| rs11065453                    | 12  | <i>P2RX7</i>   | top imputed SNP                                                              |
| rs10849851                    | 12  | <i>P2RX7</i>   | genotyped SNP                                                                |
| rs684201                      | 12  | <i>P2RX7</i>   | proxy of genotyped SNP ( $r^2 = 0.94$ , $D' = 1$ to rs10849851, MAF = 0.24)  |
| rs11065450                    | 12  | <i>P2RX7</i>   | proxy of genotyped SNP ( $r^2 = 0.65$ , $D' = 1$ to rs10849851, MAF ~ 0.3)   |
| rs11065441                    | 12  | <i>P2RX7</i>   | proxy of genotyped SNP ( $r^2 = 0.9$ , $D' = 0.96$ to rs10849851, MAF ~ 0.3) |
| rs208290                      | 12  | <i>P2RX7</i>   | proxy of genotyped SNP ( $r^2 = 0.56$ , $D' = 1$ to rs10849851, MAF ~ 0.35)  |

Remark: SNPs in *CDKN2A/B* were not selected for replication due to their high  $r^2$  with the reported SNP rs10811661 ( $r^2 = 0.8$ ). SNPs failed in genotyping were highlighted in red colour.
