# Supplementary material for: Genome-wide association study in a Chinese population identifies a susceptibility locus for type 2 diabetes at 7q32 near PAX4
Source: Springer Nature journal article supplement (doi:10.1007/s00125-013-2874-4), 2013-03-26
Supplement: MOESM14 [file 8091500]

ESM Table 4. Quality control of the genotyping results in stage 2.

| Chr | dbSNP ID   | Gene           | Minor /<br>Major<br>allele | Frequencies of<br>minor allele for<br>T2D in Chinese |               |                  | Hong Kong replication 1<br><u>Case-control study</u> |                      |                  | Shanghai replication 1<br><u>Case-control study</u> |                      |                  | Hong Kong replication 2<br><u>Family study</u> |                 |                  | Shanghai replication 2<br><u>Family study</u> |                 |  |
|-----|------------|----------------|----------------------------|------------------------------------------------------|---------------|------------------|------------------------------------------------------|----------------------|------------------|-----------------------------------------------------|----------------------|------------------|------------------------------------------------|-----------------|------------------|-----------------------------------------------|-----------------|--|
|     |            |                |                            | HapMap<br>CEU                                        | HapMap<br>CHB | SNP<br>call rate | MAF in<br>control                                    | HWE<br>$P_{control}$ | SNP<br>call rate | MAF in<br>control                                   | HWE<br>$P_{control}$ | SNP<br>call rate | HWE<br>$P_{founder}$                           | Mendel<br>error | SNP<br>call rate | HWE<br>$P_{founder}$                          | Mendel<br>error |  |
| 7   | rs10229583 | <i>PAX4</i>    | A/G                        | 0.261                                                | 0.202         | 0.996            | 0.170                                                | 0.3501               | 0.972            | 0.175                                               | 0.5036               | 0.990            | <b>0.0279</b>                                  | 1               | 0.985            | 0.8633                                        | 0               |  |
| 8   | rs2721960  | <i>TRPS1</i>   | T/C                        | 0.347                                                | 0.356         | 0.899            | 0.356                                                | 0.0656               | 0.965            | 0.362                                               | 0.4052               | --               | --                                             | --              | --               | --                                            | --              |  |
| 8   | rs2737250  | <i>TRPS1</i>   | G/A                        | 0.308                                                | 0.339         | 0.943            | 0.380                                                | 0.0808               | 0.976            | 0.379                                               | 0.4339               | 0.985            | 0.8557                                         | 1               | 0.845            | 0.3024                                        | 0               |  |
| 10  | rs3858158  | <i>COL13A1</i> | C/T                        | --                                                   | --            | 0.965            | 0.479                                                | 0.3148               | 0.975            | 0.439                                               | 0.8454               | --               | --                                             | --              | --               | --                                            | --              |  |
| 10  | rs2395272  | <i>COL13A1</i> | A/G                        | --                                                   | --            | 0.959            | 0.466                                                | 0.0521               | 0.942            | 0.416                                               | 0.7150               | --               | --                                             | --              | --               | --                                            | --              |  |
| 10  | rs57703465 | <i>COL13A1</i> | T/C                        | --                                                   | --            | 0.912            | 0.338                                                | 0.1079               | 0.974            | 0.344                                               | 0.9153               | --               | --                                             | --              | --               | --                                            | --              |  |
| 12  | rs11065441 | <i>P2RX7</i>   | C/T                        | 0.062                                                | 0.244         | 0.893            | 0.276                                                | 0.9092               | 0.971            | 0.267                                               | 0.3252               | --               | --                                             | --              | --               | --                                            | --              |  |
| 12  | rs684201   | <i>P2RX7</i>   | A/G                        | 0.070                                                | 0.244         | 0.944            | 0.274                                                | 0.2899               | 0.974            | 0.261                                               | 0.3832               | --               | --                                             | --              | --               | --                                            | --              |  |
| 12  | rs11065450 | <i>P2RX7</i>   | A/C                        | 0.239                                                | 0.262         | 0.938            | 0.312                                                | 0.3192               | 0.970            | 0.293                                               | 0.6150               | --               | --                                             | --              | --               | --                                            | --              |  |
| 12  | rs208290   | <i>P2RX7</i>   | T/C                        | 0.336                                                | 0.321         | 0.905            | 0.391                                                | 0.9262               | 0.971            | 0.355                                               | 0.7000               | --               | --                                             | --              | --               | --                                            | --              |  |
| 12  | rs10849851 | <i>P2RX7</i>   | G/A                        | 0.062                                                | 0.244         | 0.943            | 0.280                                                | 0.6369               | 0.977            | 0.259                                               | 1.0000               | --               | --                                             | --              | --               | --                                            | --              |  |
