# Supplementary material for: Genome-wide association study in a Chinese population identifies a susceptibility locus for type 2 diabetes at 7q32 near PAX4
Source: Springer Nature journal article supplement (doi:10.1007/s00125-013-2874-4), 2013-03-26
Supplement: MOESM15 [file 8091500]

**ESM Table 5. Most significantly associated SNPs for Type 2 diabetes ( $P \leq 1 \times 10^{-5}$  in meta-analysis) in both individual and combined cohorts (including directly typed and imputed SNPs) in discovery stage.**

| SNP         | Chr | Nearest gene(s) | RA/NRA | HK1 (99 T2D vs 99 controls) |                      |                |     |      | HK2 (388 T2D vs 659 controls) |                      |                      |     |      | SHGWA (197 T2D vs 197 controls) |                      |                      |     |      | Combined             |                        |           |        |
|-------------|-----|-----------------|--------|-----------------------------|----------------------|----------------|-----|------|-------------------------------|----------------------|----------------------|-----|------|---------------------------------|----------------------|----------------------|-----|------|----------------------|------------------------|-----------|--------|
|             |     |                 |        | RA Freq                     | OR (95% CI)          | $P_{adjusted}$ | IMP | Rsq  | RA Freq                       | OR (95% CI)          | $P_{adjusted}$       | IMP | Rsq  | RA Freq                         | OR (95% CI)          | $P$                  | IMP | Rsq  | OR (95% CI)          | $P_{meta}$ (uncorrect) | $P_{het}$ | $I^2$  |
| rs10229583* | 7   | PAX4            | G/A    | 0.849                       | 1.48<br>(0.85, 2.59) | 0.1645         | 0   | 1.00 | 0.835                         | 1.56<br>(1.14, 2.13) | 0.0055               | 0   | 1.00 | 0.825                           | 1.92<br>(1.32, 2.79) | $5.0 \times 10^{-4}$ | 0   | 1.00 | 1.66<br>(1.33, 2.07) | $7.7 \times 10^{-6}$   | 0.6455    | <0.001 |
| rs2737230   | 8   | TRPS1           | A/G    | 0.671                       | 1.50<br>(0.97, 2.32) | 0.0629         | 1   | 0.97 | 0.672                         | 1.54<br>(1.20, 1.97) | $5.7 \times 10^{-4}$ | 1   | 0.97 | 0.639                           | 1.60<br>(1.19, 2.16) | 0.0018               | 1   | 0.98 | 1.55<br>(1.30, 1.85) | $8.0 \times 10^{-7}$   | 0.9648    | <0.001 |
| rs2737231   | 8   | TRPS1           | A/G    | 0.671                       | 1.50<br>(0.97, 2.32) | 0.0629         | 1   | 0.97 | 0.672                         | 1.54<br>(1.20, 1.96) | $5.7 \times 10^{-4}$ | 1   | 0.97 | 0.639                           | 1.60<br>(1.19, 2.16) | 0.0017               | 1   | 0.98 | 1.55<br>(1.30, 1.85) | $8.1 \times 10^{-7}$   | 0.9644    | <0.001 |
| rs727582    | 8   | TRPS1           | A/G    | 0.671                       | 1.50<br>(0.97, 2.32) | 0.0629         | 1   | 0.97 | 0.672                         | 1.54<br>(1.20, 1.96) | $5.8 \times 10^{-4}$ | 1   | 0.97 | 0.639                           | 1.60<br>(1.19, 2.16) | 0.0017               | 1   | 0.98 | 1.55<br>(1.30, 1.85) | $8.1 \times 10^{-7}$   | 0.9644    | <0.001 |
| rs727581*   | 8   | TRPS1           | T/C    | 0.674                       | 1.48<br>(0.95, 2.28) | 0.0778         | 1   | 0.96 | 0.675                         | 1.54<br>(1.21, 1.98) | $5.2 \times 10^{-4}$ | 1   | 0.96 | 0.648                           | 1.64<br>(1.21, 2.22) | 0.0013               | 1   | 0.95 | 1.56<br>(1.31, 1.86) | $6.3 \times 10^{-7}$   | 0.9203    | <0.001 |
| rs2737234   | 8   | TRPS1           | A/G    | 0.670                       | 1.50<br>(0.97, 2.31) | 0.0630         | 1   | 0.97 | 0.672                         | 1.53<br>(1.20, 1.96) | $6.0 \times 10^{-4}$ | 1   | 0.97 | 0.639                           | 1.60<br>(1.19, 2.16) | 0.0017               | 1   | 0.98 | 1.55<br>(1.30, 1.85) | $8.4 \times 10^{-7}$   | 0.9622    | <0.001 |
| rs2178950   | 8   | TRPS1           | G/C    | 0.673                       | 1.47<br>(0.95, 2.26) | 0.0785         | 1   | 0.97 | 0.674                         | 1.48<br>(1.16, 1.90) | 0.0016               | 1   | 0.97 | 0.639                           | 1.60<br>(1.19, 2.16) | 0.0017               | 1   | 0.98 | 1.52<br>(1.28, 1.81) | $2.6 \times 10^{-6}$   | 0.9094    | <0.001 |
| rs2721956   | 8   | TRPS1           | G/A    | 0.670                       | 1.50<br>(0.97, 2.31) | 0.0631         | 1   | 0.97 | 0.671                         | 1.53<br>(1.20, 1.96) | $6.1 \times 10^{-4}$ | 1   | 0.97 | 0.639                           | 1.60<br>(1.19, 2.16) | 0.0017               | 1   | 0.98 | 1.55<br>(1.30, 1.85) | $8.4 \times 10^{-7}$   | 0.9609    | <0.001 |
| rs1983541   | 8   | TRPS1           | C/T    | 0.704                       | 1.54<br>(0.95, 2.50) | 0.0762         | 1   | 0.84 | 0.702                         | 1.64<br>(1.25, 2.15) | $3.0 \times 10^{-4}$ | 1   | 0.84 | 0.671                           | 1.63<br>(1.18, 2.26) | 0.0028               | 1   | 0.86 | 1.62<br>(1.34, 1.96) | $7.3 \times 10^{-7}$   | 0.9749    | <0.001 |
| rs2721957   | 8   | TRPS1           | G/A    | 0.670                       | 1.50<br>(0.97, 2.31) | 0.0631         | 1   | 0.97 | 0.671                         | 1.53<br>(1.20, 1.96) | $6.3 \times 10^{-4}$ | 1   | 0.97 | 0.639                           | 1.61<br>(1.19, 2.17) | 0.0017               | 1   | 0.98 | 1.55<br>(1.30, 1.85) | $8.6 \times 10^{-7}$   | 0.9590    | <0.001 |
| rs2721959   | 8   | TRPS1           | T/G    | 0.670                       | 1.50<br>(0.97, 2.31) | 0.0632         | 1   | 0.97 | 0.671                         | 1.53<br>(1.20, 1.96) | $6.4 \times 10^{-4}$ | 1   | 0.97 | 0.639                           | 1.61<br>(1.19, 2.17) | 0.0016               | 1   | 0.98 | 1.55<br>(1.30, 1.85) | $8.6 \times 10^{-7}$   | 0.9577    | <0.001 |
| rs2721960*  | 8   | TRPS1           | G/A    | 0.704                       | 1.54<br>(0.95, 2.50) | 0.0763         | 1   | 0.84 | 0.702                         | 1.64<br>(1.25, 2.15) | $3.0 \times 10^{-4}$ | 1   | 0.84 | 0.671                           | 1.63<br>(1.18, 2.26) | 0.0028               | 1   | 0.86 | 1.62<br>(1.34, 1.96) | $7.2 \times 10^{-7}$   | 0.9748    | <0.001 |
| rs2737239   | 8   | TRPS1           | A/G    | 0.670                       | 1.50<br>(0.97, 2.31) | 0.0632         | 1   | 0.97 | 0.671                         | 1.53<br>(1.19, 1.96) | $6.5 \times 10^{-4}$ | 1   | 0.97 | 0.639                           | 1.61<br>(1.19, 2.17) | 0.0016               | 1   | 0.98 | 1.55<br>(1.30, 1.85) | $8.7 \times 10^{-7}$   | 0.9572    | <0.001 |
| rs2737240   | 8   | TRPS1           | A/G    | 0.724                       | 1.35                 | 0.1870         | 1   | 0.96 | 0.729                         | 1.43                 | 0.0066               | 1   | 0.95 | 0.698                           | 1.77                 | $4.2 \times 10^{-4}$ | 1   | 0.95 | 1.52                 | $9.9 \times 10^{-6}$   | 0.5136    | <0.001 |

|             |    |                 |     |       |                      |        |   |      |       |                      |                      |   |      |       |                      |                      |   |      |                      |                      |        |        |              |  |  |  |  |
|-------------|----|-----------------|-----|-------|----------------------|--------|---|------|-------|----------------------|----------------------|---|------|-------|----------------------|----------------------|---|------|----------------------|----------------------|--------|--------|--------------|--|--|--|--|
|             |    |                 |     |       | (0.86, 2.10)         |        |   |      |       | (1.10, 1.86)         |                      |   |      |       |                      |                      |   |      | (1.28, 2.44)         |                      |        |        | (1.26, 1.82) |  |  |  |  |
| rs2737241   | 8  | <i>TRPS1</i>    | G/A | 0.670 | 1.50<br>(0.97, 2.31) | 0.0634 | 1 | 0.97 | 0.670 | 1.53<br>(1.19, 1.95) | 6.8×10 <sup>-4</sup> | 1 | 0.96 | 0.639 | 1.61<br>(1.19, 2.17) | 0.0016               | 1 | 0.98 | 1.55<br>(1.30, 1.84) | 9.0×10 <sup>-7</sup> | 0.9552 | <0.001 |              |  |  |  |  |
| rs2737242   | 8  | <i>TRPS1</i>    | T/C | 0.670 | 1.50<br>(0.97, 2.31) | 0.0633 | 1 | 0.97 | 0.670 | 1.53<br>(1.19, 1.95) | 6.8×10 <sup>-4</sup> | 1 | 0.96 | 0.639 | 1.61<br>(1.19, 2.17) | 0.0016               | 1 | 0.98 | 1.55<br>(1.30, 1.84) | 9.0×10 <sup>-7</sup> | 0.9552 | <0.001 |              |  |  |  |  |
| rs2737243   | 8  | <i>TRPS1</i>    | G/C | 0.670 | 1.50<br>(0.97, 2.31) | 0.0633 | 1 | 0.97 | 0.670 | 1.53<br>(1.19, 1.95) | 6.9×10 <sup>-4</sup> | 1 | 0.96 | 0.639 | 1.61<br>(1.19, 2.17) | 0.0016               | 1 | 0.98 | 1.55<br>(1.30, 1.84) | 9.1×10 <sup>-7</sup> | 0.9546 | <0.001 |              |  |  |  |  |
| rs2737244   | 8  | <i>TRPS1</i>    | A/T | 0.670 | 1.50<br>(0.97, 2.31) | 0.0634 | 1 | 0.97 | 0.670 | 1.53<br>(1.19, 1.95) | 6.9×10 <sup>-4</sup> | 1 | 0.96 | 0.639 | 1.61<br>(1.19, 2.17) | 0.0016               | 1 | 0.98 | 1.55<br>(1.30, 1.84) | 8.5×10 <sup>-7</sup> | 0.9533 | <0.001 |              |  |  |  |  |
| rs2721962   | 8  | <i>TRPS1</i>    | T/A | 0.652 | 1.46<br>(0.95, 2.24) | 0.0838 | 1 | 0.98 | 0.644 | 1.44<br>(1.13, 1.83) | 0.0031               | 1 | 0.97 | 0.618 | 1.63<br>(1.21, 2.19) | 9.5×10 <sup>-4</sup> | 1 | 0.99 | 1.50<br>(1.27, 1.79) | 3.2×10 <sup>-6</sup> | 0.8047 | <0.001 |              |  |  |  |  |
| rs2178951   | 8  | <i>TRPS1</i>    | A/G | 0.655 | 1.43<br>(0.93, 2.21) | 0.1022 | 1 | 0.98 | 0.646 | 1.45<br>(1.14, 1.85) | 0.0026               | 1 | 0.97 | 0.622 | 1.63<br>(1.21, 2.19) | 0.0010               | 1 | 0.99 | 1.51<br>(1.27, 1.79) | 3.4×10 <sup>-6</sup> | 0.8118 | <0.001 |              |  |  |  |  |
| rs2205380   | 8  | <i>TRPS1</i>    | G/A | 0.651 | 1.45<br>(0.95, 2.23) | 0.0850 | 1 | 0.99 | 0.642 | 1.43<br>(1.12, 1.81) | 0.0037               | 1 | 0.98 | 0.619 | 1.63<br>(1.22, 2.19) | 9.1×10 <sup>-4</sup> | 1 | 0.99 | 1.50<br>(1.26, 1.78) | 3.9×10 <sup>-6</sup> | 0.7780 | <0.001 |              |  |  |  |  |
| rs2737247*  | 8  | <i>TRPS1</i>    | A/G | 0.651 | 1.45<br>(0.95, 2.23) | 0.0852 | 0 | 1.00 | 0.640 | 1.41<br>(1.11, 1.79) | 0.0048               | 0 | 1.00 | 0.619 | 1.63<br>(1.22, 2.18) | 8.9×10 <sup>-4</sup> | 0 | 1.00 | 1.49<br>(1.25, 1.76) | 4.9×10 <sup>-6</sup> | 0.7400 | <0.001 |              |  |  |  |  |
| rs2737248   | 8  | <i>TRPS1</i>    | A/G | 0.651 | 1.45<br>(0.95, 2.23) | 0.0848 | 1 | 0.99 | 0.640 | 1.41<br>(1.11, 1.79) | 0.0048               | 1 | 0.99 | 0.619 | 1.63<br>(1.22, 2.18) | 8.9×10 <sup>-4</sup> | 1 | 0.99 | 1.49<br>(1.25, 1.76) | 4.9×10 <sup>-6</sup> | 0.7400 | <0.001 |              |  |  |  |  |
| rs2737250*  | 8  | <i>TRPS1</i>    | A/G | 0.654 | 1.46<br>(0.95, 2.23) | 0.0812 | 0 | 1.00 | 0.641 | 1.40<br>(1.10, 1.77) | 0.0058               | 0 | 1.00 | 0.617 | 1.64<br>(1.22, 2.19) | 8.3×10 <sup>-4</sup> | 1 | 0.99 | 1.48<br>(1.25, 1.76) | 5.6×10 <sup>-6</sup> | 0.7112 | <0.001 |              |  |  |  |  |
| rs10965243  | 9  | <i>CDKN2A/B</i> | A/G | 0.596 | 2.13<br>(1.31, 3.45) | 0.0017 | 1 | 0.82 | 0.623 | 1.44<br>(1.14, 1.82) | 0.0019               | 0 | 1.00 | 0.621 | 1.42<br>(1.07, 1.89) | 0.0135               | 0 | 1.00 | 1.51<br>(1.26, 1.81) | 8.6×10 <sup>-6</sup> | 0.3268 | 0.106  |              |  |  |  |  |
| rs10965245  | 9  | <i>CDKN2A/B</i> | G/A | 0.596 | 2.12<br>(1.31, 3.44) | 0.0017 | 1 | 0.82 | 0.623 | 1.44<br>(1.14, 1.82) | 0.0019               | 1 | 0.98 | 0.621 | 1.42<br>(1.07, 1.89) | 0.0138               | 1 | 0.99 | 1.51<br>(1.26, 1.81) | 7.3×10 <sup>-6</sup> | 0.3310 | 0.096  |              |  |  |  |  |
| rs3858158*  | 10 | <i>COL13A1</i>  | T/C | 0.586 | 1.55<br>(0.97, 2.46) | 0.0628 | 1 | 0.82 | 0.569 | 1.71<br>(1.33, 2.20) | 2.4×10 <sup>-5</sup> | 1 | 0.83 | 0.604 | 1.33<br>(0.98, 1.81) | 0.0696               | 1 | 0.83 | 1.55<br>(1.29, 1.85) | 2.1×10 <sup>-6</sup> | 0.4686 | <0.001 |              |  |  |  |  |
| rs2395272*  | 10 | <i>COL13A1</i>  | G/A | 0.583 | 1.50<br>(0.96, 2.33) | 0.0728 | 1 | 0.89 | 0.566 | 1.67<br>(1.31, 2.13) | 2.5×10 <sup>-5</sup> | 1 | 0.89 | 0.605 | 1.31<br>(0.97, 1.76) | 0.0794               | 1 | 0.89 | 1.51<br>(1.27, 1.80) | 3.1×10 <sup>-6</sup> | 0.4497 | <0.001 |              |  |  |  |  |
| rs57703465* | 10 | <i>COL13A1</i>  | G/A | 0.717 | 1.57<br>(0.86, 2.86) | 0.1363 | 1 | 0.58 | 0.704 | 1.95<br>(1.40, 2.70) | 4.9×10 <sup>-5</sup> | 1 | 0.59 | 0.745 | 1.45<br>(0.94, 2.24) | 0.0901               | 1 | 0.54 | 1.72<br>(1.35, 2.19) | 9.1×10 <sup>-6</sup> | 0.5446 | <0.001 |              |  |  |  |  |
| rs3861798   | 12 | <i>P2RX7</i>    | T/C | 0.762 | 1.29<br>(0.78, 2.15) | 0.3212 | 1 | 0.98 | 0.751 | 1.60<br>(1.22, 2.09) | 4.9×10 <sup>-4</sup> | 1 | 0.97 | 0.712 | 1.67<br>(1.20, 2.32) | 0.0022               | 1 | 0.98 | 1.57<br>(1.30, 1.91) | 4.0×10 <sup>-6</sup> | 0.7063 | <0.001 |              |  |  |  |  |
| chr12:12004 | 12 | <i>P2RX7</i>    | C/T | 0.744 | 1.40                 | 0.2345 | 1 | 0.78 | 0.762 | 1.63                 | 9.8×10 <sup>-4</sup> | 1 | 0.83 | 0.732 | 1.73                 | 0.0026               | 1 | 0.83 | 1.63                 | 6.7×10 <sup>-6</sup> | 0.8136 | <0.001 |              |  |  |  |  |

|             |    |       |     |       |                      |        |   |      |       |                      |                      |   |      |       |                      |        |   |      |                      |                      |        |        |  |  |  |  |              |
|-------------|----|-------|-----|-------|----------------------|--------|---|------|-------|----------------------|----------------------|---|------|-------|----------------------|--------|---|------|----------------------|----------------------|--------|--------|--|--|--|--|--------------|
| 9816        |    |       |     |       | (0.80, 2.43)         |        |   |      |       | (1.21, 2.20)         |                      |   |      |       |                      |        |   |      |                      | (1.20, 2.50)         |        |        |  |  |  |  | (1.32, 2.01) |
| rs11065445  | 12 | P2RX7 | C/G | 0.733 | 1.42<br>(0.84, 2.39) | 0.1844 | 1 | 0.88 | 0.742 | 1.52<br>(1.17, 1.99) | 0.0016               | 1 | 0.97 | 0.717 | 1.65<br>(1.18, 2.30) | 0.0029 | 1 | 0.98 | 1.55<br>(1.28, 1.88) | 8.4×10 <sup>-6</sup> | 0.8818 | <0.001 |  |  |  |  |              |
| rs684201*   | 12 | P2RX7 | G/A | 0.733 | 1.42<br>(0.84, 2.40) | 0.1834 | 1 | 0.88 | 0.742 | 1.52<br>(1.17, 1.99) | 0.0016               | 1 | 0.97 | 0.717 | 1.64<br>(1.18, 2.30) | 0.0029 | 1 | 0.98 | 1.55<br>(1.28, 1.88) | 8.6×10 <sup>-6</sup> | 0.8864 | <0.001 |  |  |  |  |              |
| rs3900976   | 12 | P2RX7 | C/T | 0.733 | 1.38<br>(0.82, 2.33) | 0.2208 | 1 | 0.88 | 0.741 | 1.52<br>(1.16, 1.98) | 0.0018               | 1 | 0.97 | 0.717 | 1.66<br>(1.19, 2.31) | 0.0025 | 1 | 0.98 | 1.54<br>(1.27, 1.87) | 9.8×10 <sup>-6</sup> | 0.8360 | <0.001 |  |  |  |  |              |
| rs79362551  | 12 | P2RX7 | G/A | 0.733 | 1.39<br>(0.83, 2.35) | 0.2109 | 1 | 0.88 | 0.742 | 1.52<br>(1.17, 1.98) | 0.0017               | 1 | 0.97 | 0.717 | 1.65<br>(1.18, 2.30) | 0.0027 | 1 | 0.98 | 1.55<br>(1.27, 1.87) | 9.7×10 <sup>-6</sup> | 0.8567 | <0.001 |  |  |  |  |              |
| rs11065452  | 12 | P2RX7 | G/T | 0.734 | 1.44<br>(0.85, 2.43) | 0.1703 | 1 | 0.87 | 0.742 | 1.53<br>(1.17, 2.00) | 0.0015               | 1 | 0.97 | 0.717 | 1.64<br>(1.17, 2.29) | 0.0032 | 1 | 0.98 | 1.55<br>(1.28, 1.88) | 8.5×10 <sup>-6</sup> | 0.9069 | <0.001 |  |  |  |  |              |
| s11065453*  | 12 | P2RX7 | C/T | 0.772 | 1.38<br>(0.81, 2.34) | 0.2355 | 1 | 0.93 | 0.750 | 1.62<br>(1.23, 2.12) | 4.2×10 <sup>-4</sup> | 1 | 0.96 | 0.721 | 1.66<br>(1.19, 2.32) | 0.0025 | 1 | 0.97 | 1.60<br>(1.31, 1.94) | 2.9×10 <sup>-6</sup> | 0.8362 | <0.001 |  |  |  |  |              |
| rs10849849  | 12 | P2RX7 | A/G | 0.772 | 1.52<br>(0.89, 2.62) | 0.1237 | 1 | 0.91 | 0.755 | 1.63<br>(1.23, 2.15) | 4.8×10 <sup>-4</sup> | 1 | 0.92 | 0.732 | 1.56<br>(1.11, 2.21) | 0.0099 | 1 | 0.91 | 1.59<br>(1.30, 1.95) | 5.7×10 <sup>-6</sup> | 0.9704 | <0.001 |  |  |  |  |              |
| rs10849850  | 12 | P2RX7 | A/G | 0.769 | 1.58<br>(0.94, 2.67) | 0.0813 | 1 | 0.98 | 0.749 | 1.63<br>(1.25, 2.14) | 2.8×10 <sup>-4</sup> | 1 | 0.98 | 0.725 | 1.50<br>(1.09, 2.08) | 0.0134 | 1 | 0.99 | 1.58<br>(1.30, 1.92) | 3.5×10 <sup>-6</sup> | 0.9286 | <0.001 |  |  |  |  |              |
| rs208289    | 12 | P2RX7 | A/G | 0.721 | 1.55<br>(0.91, 2.63) | 0.1064 | 1 | 0.82 | 0.709 | 1.64<br>(1.24, 2.16) | 3.8×10 <sup>-4</sup> | 1 | 0.85 | 0.692 | 1.51<br>(1.08, 2.11) | 0.0154 | 1 | 0.86 | 1.58<br>(1.29, 1.92) | 6.4×10 <sup>-6</sup> | 0.9312 | <0.001 |  |  |  |  |              |
| rs208292    | 12 | P2RX7 | A/G | 0.765 | 1.50<br>(0.90, 2.51) | 0.1176 | 1 | 0.99 | 0.746 | 1.64<br>(1.26, 2.14) | 2.2×10 <sup>-4</sup> | 1 | 0.99 | 0.724 | 1.47<br>(1.06, 2.04) | 0.0184 | 1 | 0.99 | 1.56<br>(1.29, 1.89) | 5.2×10 <sup>-6</sup> | 0.8717 | <0.001 |  |  |  |  |              |
| rs10849851* | 12 | P2RX7 | A/G | 0.765 | 1.50<br>(0.90, 2.51) | 0.1179 | 0 | 1.00 | 0.746 | 1.64<br>(1.26, 2.14) | 2.2×10 <sup>-4</sup> | 0 | 1.00 | 0.724 | 1.47<br>(1.07, 2.04) | 0.0185 | 0 | 1.00 | 1.56<br>(1.29, 1.89) | 5.1×10 <sup>-6</sup> | 0.8704 | <0.001 |  |  |  |  |              |
| rs6489794   | 12 | P2RX7 | G/A | 0.765 | 1.50<br>(0.90, 2.51) | 0.1174 | 1 | 0.99 | 0.746 | 1.64<br>(1.26, 2.14) | 2.2×10 <sup>-4</sup> | 1 | 0.99 | 0.724 | 1.47<br>(1.07, 2.04) | 0.0180 | 1 | 0.99 | 1.56<br>(1.29, 1.89) | 4.9×10 <sup>-6</sup> | 0.8706 | <0.001 |  |  |  |  |              |
| rs11065458  | 12 | P2RX7 | C/T | 0.767 | 1.56<br>(0.93, 2.62) | 0.0872 | 1 | 0.99 | 0.747 | 1.64<br>(1.25, 2.15) | 2.6×10 <sup>-4</sup> | 1 | 0.98 | 0.724 | 1.48<br>(1.07, 2.05) | 0.0170 | 1 | 0.99 | 1.57<br>(1.30, 1.91) | 4.4×10 <sup>-6</sup> | 0.8894 | <0.001 |  |  |  |  |              |

“\*” refers to the SNP selected for stage 2 replication. Nearest Entrez genes within 250 kb.  $P_{adjusted}$ ,  $P$ ,  $P_{meta}$  and  $P_{het}$  represent  $P$  values from logistic regression with/without adjustment for age and sex under the additive genetic model, meta-analysis under a random effects models (uncorrected for genomic control) and test of heterogeneity, respectively. Risk allele refers to the allele with a higher frequency in T2D patients than in controls in stage 1 meta-analysis. OR, odds ratio are reported with respect to the risk allele. RA, risk allele; NRA, non-risk allele; IMP, 1 = imputed, 2 = genotyped; Rsq, indicates the imputation quality provided from MACH.
