# Supplementary material for: Genome-wide association study in a Chinese population identifies a susceptibility locus for type 2 diabetes at 7q32 near PAX4
Source: Springer Nature journal article supplement (doi:10.1007/s00125-013-2874-4), 2013-03-26
Supplement: MOESM16 [file 8091500]

**ESM Table 6. Logistic regression results of T2D with the selected top SNPs adjusted for the first principle component in stage 1.**

| SNP        | Chr | Nearest gene(s) | Risk/ Non-risk allele | HK1 (99 T2D vs 99 controls) |                | HK2 (388 T2D vs 659 controls) |                      | SHGWA (197 T2D vs 197 controls) |                      | Combined             |                        |           |
|------------|-----|-----------------|-----------------------|-----------------------------|----------------|-------------------------------|----------------------|---------------------------------|----------------------|----------------------|------------------------|-----------|
|            |     |                 |                       | OR (95% CI)                 | $P_{adjusted}$ | OR (95% CI)                   | $P_{adjusted}$       | OR (95% CI)                     | $P_{adjusted}$       | OR (95% CI)          | $P_{meta}$ (uncorrect) | $P_{het}$ |
| rs10229583 | 7   | <i>PAX4</i>     | G/A                   | 1.41<br>(0.8, 2.48)         | 0.236          | 1.55<br>(1.13, 2.13)          | 0.0061               | 1.91<br>(1.31, 2.78)            | $7.9 \times 10^{-4}$ | 1.64<br>(1.31, 2.05) | $1.3 \times 10^{-5}$   | 0.5996    |
| rs2737250  | 8   | <i>TRPS1</i>    | A/G                   | 1.47<br>(0.96, 2.26)        | 0.0775         | 1.4<br>(1.1, 1.78)            | 0.006                | 1.65<br>(1.23, 2.21)            | $8.4 \times 10^{-4}$ | 1.49<br>(1.26, 1.77) | $4.5 \times 10^{-6}$   | 0.6965    |
| rs2721960  | 8   | <i>TRPS1</i>    | G/A                   | 1.56<br>(0.96, 2.54)        | 0.0711         | 1.64<br>(1.25, 2.16)          | $3.3 \times 10^{-4}$ | 1.65<br>(1.19, 2.28)            | 0.0027               | 1.63<br>(1.35, 1.98) | $6.0 \times 10^{-7}$   | 0.9808    |
| rs3858158  | 10  | <i>COL13A1</i>  | T/C                   | 1.65<br>(1.03, 2.65)        | 0.0389         | 1.72<br>(1.33, 2.21)          | $3.0 \times 10^{-5}$ | 1.32<br>(0.97, 1.81)            | 0.0762               | 1.56<br>(1.3, 1.87)  | $1.8 \times 10^{-6}$   | 0.4195    |
| rs2395272  | 10  | <i>COL13A1</i>  | G/A                   | 1.58<br>(1.01, 2.49)        | 0.0462         | 1.68<br>(1.31, 2.14)          | $3.1 \times 10^{-5}$ | 1.3<br>(0.96, 1.75)             | 0.0864               | 1.53<br>(1.28, 1.82) | $2.9 \times 10^{-6}$   | 0.4337    |
| rs57703465 | 10  | <i>COL13A1</i>  | G/A                   | 1.68<br>(0.91, 3.08)        | 0.0955         | 1.95<br>(1.41, 2.71)          | $6.2 \times 10^{-5}$ | 1.44<br>(0.94, 2.23)            | 0.0972               | 1.74<br>(1.37, 2.2)  | $5.7 \times 10^{-6}$   | 0.5372    |
| rs11065453 | 12  | <i>P2RX7</i>    | C/T                   | 1.43<br>(0.84, 2.44)        | 0.1906         | 1.61<br>(1.23, 2.11)          | $5.5 \times 10^{-4}$ | 1.64<br>(1.17, 2.3)             | 0.0038               | 1.59<br>(1.31, 1.94) | $3.1 \times 10^{-6}$   | 0.9082    |
| rs10849851 | 12  | <i>P2RX7</i>    | A/G                   | 1.56<br>(0.93, 2.62)        | 0.0906         | 1.64<br>(1.25, 2.14)          | $3.1 \times 10^{-4}$ | 1.45<br>(1.04, 2.02)            | 0.0266               | 1.56<br>(1.28, 1.9)  | $7.6 \times 10^{-6}$   | 0.8538    |
| rs684201   | 12  | <i>P2RX7</i>    | G/A                   | 1.5<br>(0.89, 2.54)         | 0.1314         | 1.52<br>(1.17, 1.98)          | 0.002                | 1.63<br>(1.17, 2.27)            | 0.0043               | 1.55<br>(1.28, 1.88) | $6.5 \times 10^{-6}$   | 0.9396    |
