# Supplementary material for: Genome-wide association study in a Chinese population identifies a susceptibility locus for type 2 diabetes at 7q32 near PAX4
Source: Springer Nature journal article supplement (doi:10.1007/s00125-013-2874-4), 2013-03-26
Supplement: MOESM17 [file 8091500]

**ESM Table 7. Alternating logistic regression results of T2D for *PAX4* rs10229583 and *TRPS1* rs2737250 SNPs in *de novo* replication of family study in Chinese populations.**

| Study                                                | N     |         | <i>PAX4</i> rs10229583 (G) |             |                      |                      |           | <i>TRPS1</i> rs2737250 (A) |          |             |                      |                |                      |       |
|------------------------------------------------------|-------|---------|----------------------------|-------------|----------------------|----------------------|-----------|----------------------------|----------|-------------|----------------------|----------------|----------------------|-------|
|                                                      | Case  | Control | Case RAF                   | Control RAF | OR (95% CI)          | $P_{additive}$       | $P_{het}$ | $I^2$                      | Case RAF | Control RAF | OR (95% CI)          | $P_{additive}$ | $P_{het}$            | $I^2$ |
| Hong Kong replication 2                              | 325   | 368     | 0.872                      | 0.856       | 1.22<br>(0.85, 1.74) | 0.2817               |           |                            | 0.682    | 0.704       | 0.86<br>(0.68, 1.09) | 0.2026         |                      |       |
| Shanghai replication 2                               | 657   | 168     | 0.824                      | 0.813       | 1.09<br>(0.80, 1.49) | 0.5757               |           |                            | 0.618    | 0.646       | 0.82<br>(0.70, 0.97) | 0.0218         |                      |       |
| Meta-analysis of family studies in Chinese           | 982   | 536     |                            |             | 1.15<br>(0.91, 1.45) | 0.2590               | 0.6567    | 0.000                      |          |             | 0.83<br>(0.73, 0.96) | 0.0091         | 0.7859               | 0.000 |
| Meta-analysis of studies in stage 1 and 2 in Chinese | 11067 | 7929    |                            |             | 1.18<br>(1.11, 1.25) | $2.6 \times 10^{-8}$ | 0.0839    | 0.596                      |          |             | 1.07<br>(1.02, 1.12) | 0.0034         | $1.5 \times 10^{-5}$ | 0.855 |

Nearest Entrez genes within 250 kb.  $P_{additive}$  and  $P_{het}$  represents  $P$  values from alternating logistic regression with adjustment of sex and age under additive genetic model or meta-analysis under fixed effect models and test of heterogeneity, respectively. Risk allele of genetic variant is indicated within the parentheses. OR, odds ratios are reported with respect to the risk allele in stage 1; RAF, risk allele frequency.
