# Supplementary material for: Genome-wide association study in a Chinese population identifies a susceptibility locus for type 2 diabetes at 7q32 near PAX4
Source: Springer Nature journal article supplement (doi:10.1007/s00125-013-2874-4), 2013-03-26
Supplement: MOESM18 [file 8091500]

**ESM Table 8. Associations of rs10229583 with age at diagnosis in Chinese T2D patients.**

| Study                 | Genotypes               | N    | Mean ± SD   | Age at diagnosis               |                                            |                                                                |
|-----------------------|-------------------------|------|-------------|--------------------------------|--------------------------------------------|----------------------------------------------------------------|
|                       |                         |      |             | <i>P</i> <sub>unadjusted</sub> | <i>P</i> <sub>adjusted</sub> (sex and BMI) | <i>P</i> <sub>adjusted</sub> (sex, BMI and Hb <sub>a1c</sub> ) |
| Hong Kong T2D case    | AA                      | 129  | 51.1 ± 11.7 | <b>0.0043</b>                  | <b>0.0095</b>                              | <b>0.0101</b>                                                  |
|                       | AG                      | 1479 | 50.4 ± 13.1 |                                |                                            |                                                                |
|                       | GG                      | 4129 | 49.4 ± 12.8 |                                |                                            |                                                                |
| Shanghai T2D case     | AA                      | 103  | 54.2 ± 11.5 | <b>0.0193</b>                  | <b>0.0185</b>                              | 0.3173                                                         |
|                       | AG                      | 1110 | 53.3 ± 11.8 |                                |                                            |                                                                |
|                       | GG                      | 3103 | 52.4 ± 12.2 |                                |                                            |                                                                |
| Combined              |                         |      |             | <b>2.3 × 10<sup>-4</sup></b>   | <b>4.6 × 10<sup>-4</sup></b>               | <b>0.0095</b>                                                  |
| Test of heterogeneity | <i>P</i> <sub>het</sub> |      |             | 0.8202                         | 0.9850                                     | 0.3429                                                         |
|                       | <i>I</i> <sup>2</sup>   |      |             | 0.000                          | 0.000                                      | 0.000                                                          |

Data are expressed as n and mean ± SD. *P*<sub>unadjusted</sub> and *P*<sub>adjusted</sub> represent *P* values calculated from linear regression with and without adjustments for sex, BMI and Hb<sub>a1c</sub> (where appropriate) under the additive genetic model. In the combined analysis, *P* values were obtained from meta-analysis of two Chinese T2D case cohorts (Hong Kong and Shanghai) under a fixed effect model.
