# Supplementary material for: Genome-wide association study in a Chinese population identifies a susceptibility locus for type 2 diabetes at 7q32 near PAX4
Source: Springer Nature journal article supplement (doi:10.1007/s00125-013-2874-4), 2013-03-26
Supplement: MOESM19 [file 8091500]

**ESM Table 9. eQTL analysis results between rs1440971 (chr7:127059636) and expression of genes within 1MB of the SNP from the GenCord Project**

| Probe        | Gene        | TSS       | Lymphoblastoid cells |               |                         | Peak eQTL SNP in LCL |           |                       |                       |
|--------------|-------------|-----------|----------------------|---------------|-------------------------|----------------------|-----------|-----------------------|-----------------------|
|              |             |           | <i>rho</i>           | <i>P</i>      | <i>P</i> <sub>adj</sub> | SNP ID               | Position  | <i>r</i> <sup>2</sup> | <i>P</i>              |
| ILMN_1729212 | <i>GRM8</i> | 125865888 | -0.342               | <b>0.0026</b> | <b>0.0028</b>           | rs6467157            | 127447999 |                       | $3.29 \times 10^{-4}$ |
| ILMN_1752340 | <i>ARF5</i> | 127015752 | -0.24                | <b>0.0383</b> | <b>0.0379</b>           | rs10487483           | 126861374 | 0.023                 | 0.0014                |
| ILMN_1793101 | <i>PAX4</i> | 127037582 | 0.273                | <b>0.0176</b> | <b>0.0173</b>           | rs6467157            | 127447999 |                       | $1.21 \times 10^{-4}$ |

TSS: transcription start site position; *rho*: Spearman's rank correlation coefficient; *P*: *P* value for the association; *P*<sub>adj</sub>: adjusted *P* value after 10000 permutations.
