# Supplementary material for: Genome-wide association study in a Chinese population identifies a susceptibility locus for type 2 diabetes at 7q32 near PAX4
Source: Springer Nature journal article supplement (doi:10.1007/s00125-013-2874-4), 2013-03-26
Supplement: MOESM20 [file 8091500]

**ESM Table 10. eQTL analysis showing evidence suggesting of cis-association ( $p < 0.05$ ) between identified variant rs10229583 or its proxy rs1440971 and expression of genes within 1Mb of the SNP using data from the MuTHER Consortium. The A1 allele listed in the table is the reference/effect allele. The last 3 columns refer to the peak eQTL SNP in the corresponding tissue showing suggestive association (highlighted in bold) and  $r^2$  between the peak eQTL SNP and rs10229583.**

| PROBE        | GENE           | Position  | A1 | Freq1 | Adipose |        |               | LCL     |        |               | Skin    |        |            | Peak eQTL SNP |       |                             |
|--------------|----------------|-----------|----|-------|---------|--------|---------------|---------|--------|---------------|---------|--------|------------|---------------|-------|-----------------------------|
|              |                |           |    |       | Beta    | SE     | $P_{eQTL}$    | Beta    | SE     | $P_{eQTL}$    | Beta    | SE     | $P_{eQTL}$ | ID            | $r^2$ | $P_{eQTL}$                  |
| rs10229583   |                |           |    |       |         |        |               |         |        |               |         |        |            |               |       |                             |
| ILMN_1655961 | <i>C7orf54</i> | 127034139 | G  | 0.75  | -0.0091 | 0.0143 | 0.5248        | -0.0348 | 0.0172 | <b>0.0426</b> | -0.0232 | 0.0175 | 0.1855     | rs322812      | 0.56  | <b>3.66x10<sup>-5</sup></b> |
| ILMN_1659990 | <i>C7orf68</i> | 127034139 | G  | 0.75  | -0.042  | 0.0207 | <b>0.0415</b> | -0.0028 | 0.0299 | 0.9248        | 0.0008  | 0.0174 | 0.9618     | rs10229583    | 1     | <b>0.0415</b>               |
| ILMN_1752340 | <i>ARF5</i>    | 127034139 | G  | 0.75  | -0.011  | 0.0121 | 0.3502        | -0.0239 | 0.0101 | <b>0.0185</b> | -0.0066 | 0.0176 | 0.7065     | rs806179      | 1     | <b>0.0042</b>               |
| rs1440971    |                |           |    |       |         |        |               |         |        |               |         |        |            |               |       |                             |
| ILMN_1655961 | <i>C7orf54</i> | 127059636 | G  | 0.182 | 0.0161  | 0.0165 | 0.3285        | 0.0651  | 0.0199 | <b>0.001</b>  | 0.0098  | 0.0202 | 0.627      | rs322812      | 0.56  | <b>3.66x10<sup>-5</sup></b> |
| ILMN_1752340 | <i>ARF5</i>    | 127059636 | G  | 0.182 | 0.0039  | 0.0140 | 0.779         | 0.0283  | 0.0117 | <b>0.0161</b> | -0.0089 | 0.0202 | 0.661      | rs806179      | 1     | <b>0.0042</b>               |
