# Supplementary material for: Genome-wide association study in a Chinese population identifies a susceptibility locus for type 2 diabetes at 7q32 near PAX4
Source: Springer Nature journal article supplement (doi:10.1007/s00125-013-2874-4), 2013-03-26
Supplement: MOESM21 [file 8091500]

**ESM Table 11. Heterogeneity test of OR of rs10229583 among different populations in the present study.**

| Population         | OR                   | Heterogeneity of OR    |                       |
|--------------------|----------------------|------------------------|-----------------------|
|                    | (95% CI)             | <i>Q</i> test <i>P</i> | <i>I</i> <sup>2</sup> |
| Chinese            | 1.18<br>(1.11, 1.25) | --                     | --                    |
| Japanese + Korean  | 1.09<br>(1.01, 1.18) | 0.1254                 | 0.5742                |
| DIAGRAM+           | 1.06<br>(1.02, 1.12) | 0.0088                 | 0.8544                |
| Malaysian + Indian | 0.90<br>(0.82, 1.00) | $1.1 \times 10^{-5}$   | 0.9485                |

*Q* test *P* and *I*<sup>2</sup> refer to the statistical significance and quantified index of heterogeneity test of OR between Chinese and other populations, respectively.
