# Supplementary material for: Genome-wide association study in a Chinese population identifies a susceptibility locus for type 2 diabetes at 7q32 near PAX4
Source: Springer Nature journal article supplement (doi:10.1007/s00125-013-2874-4), 2013-03-26
Supplement: MOESM22 [file 8091500]

**ESM Table 12. Comparisons of regional LD and allelic discrepancies of rs10229583 among different populations using the HapMap phase 3 data.**

| Population | Genotype frequencies |       |       | Allele frequencies |                     | Regional LD variation | Allelic difference     |
|------------|----------------------|-------|-------|--------------------|---------------------|-----------------------|------------------------|
|            | G/G                  | A/G   | A/A   | Risk allele (G)    | Non-risk allele (A) | Monte Carlo <i>P</i>  | $\chi^2$ test <i>P</i> |
| CHB        | 0.664                | 0.307 | 0.029 | 0.818              | 0.182               | --                    | --                     |
| JPT        | 0.777                | 0.223 | 0.000 | 0.888              | 0.112               | 0.0107                | 0.0278                 |
| CEU        | 0.566                | 0.345 | 0.088 | 0.739              | 0.261               | 0.0018                | 0.0342                 |
| YRI        | 0.517                | 0.415 | 0.068 | 0.724              | 0.276               | 0.0003                | 0.0085                 |

Monte Carlo and  $\chi^2$  test *P* refer to the *P* values testing for the regional LD variation and allelic difference between CHB and other populations, respectively. CHB: Han Chinese in Beijing, China; JPT: Japanese in Tokyo, Japan; CEU: Utah residents with Northern and Western European ancestry from the CEPH collection; YRI: Yoruban in Ibadan, Nigeria.
